# Supplementary material
Source: publisher figshare collection journal article supplement (https://sage.figshare.com/ndownloader/files/17461733)
Supplement: Supplementary file 1 [file 17461733]

Reviewer 4 v.2

Comments to the author:

No further comment from my side.
